# Supplementary material
Source: PubMed Central journal article supplement (PMC5526096)
Supplement: NIHMS878859-supplement.pdf [file NIHMS878859-supplement.pdf]

## **SUPPLEMENTAL FIGURES AND LEGENDS**

Figure S1 is related to Fig. 1

Figure S2 is related to Fig. 2

Figure S3 is related to Fig. 3

Figure S4 is related to Fig. 4

Figure S5 is related to Fig. 5

## **SUPPLEMENTAL EXPERIMENTAL PROCEDURES**

## **SUPPLEMENTAL REFERENCES**
